# Supplementary material for: Activation of Membrane Estrogen Receptors Attenuates NOP-Mediated Tactile Antihypersensitivity in a Rodent Model of Neuropathic Pain
Source: MDPI journal article supplement (doi:10.3390/brainsci9060147), 2019-06-21
Supplement: s1 [file s1]

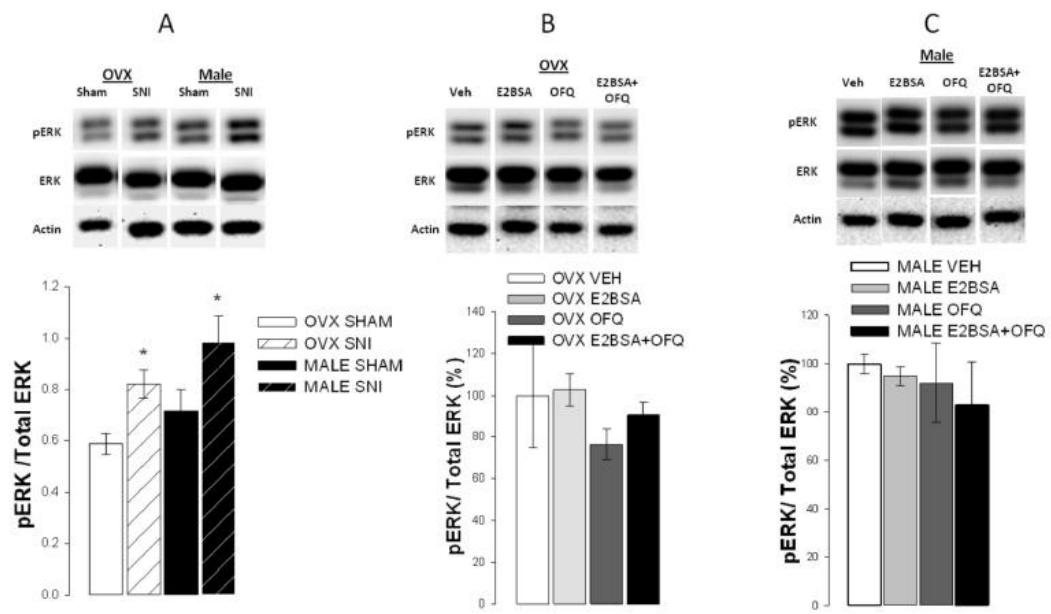

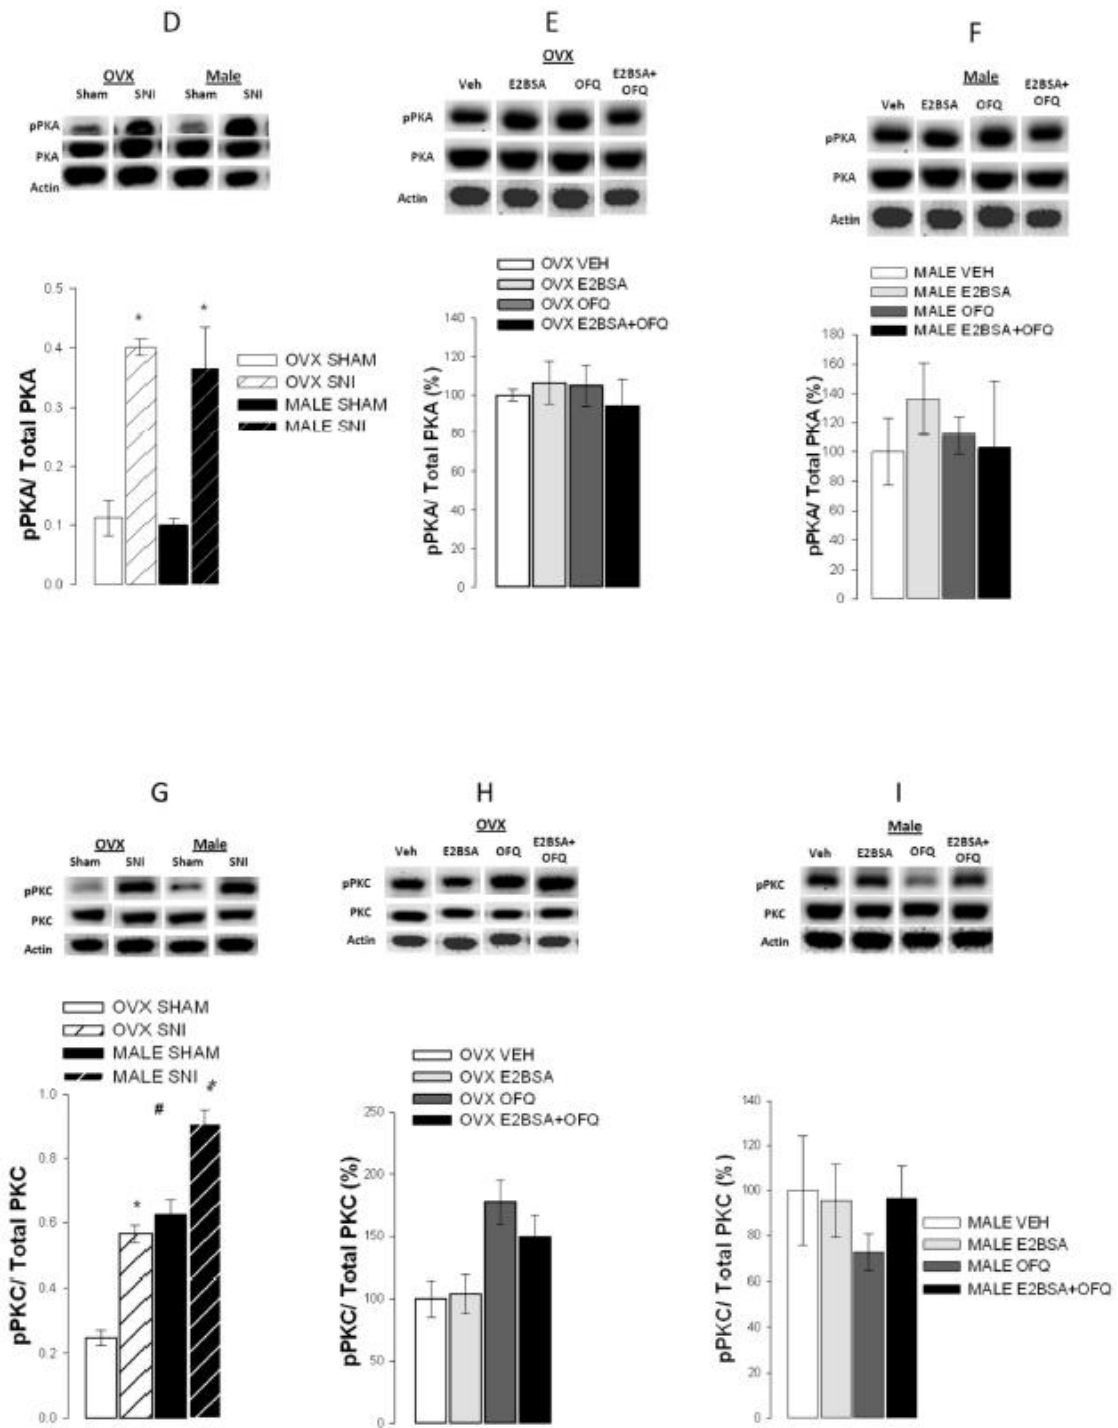

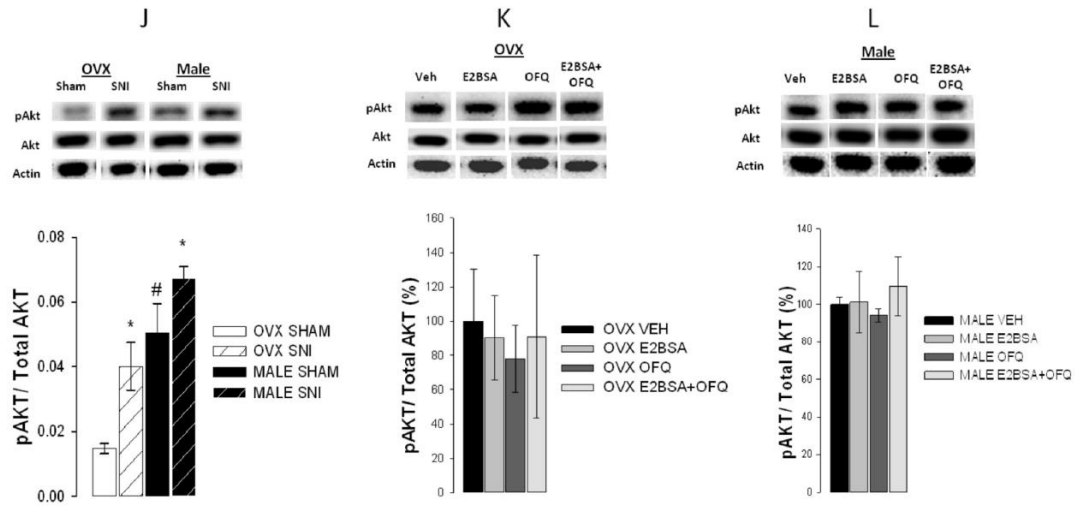

**Figure 1.** E2BSA abolishes NOP-mediated anti-hypersensitivity via an ERK, PKA, PKC, and Akt-independent mechanism. SNI induced significant increases in spinal phosphorylation of ERK (A); PKA (D); PKC (G); and Akt (J) in OVX and male rats. However, mER activation did not significantly change spinal phosphorylation of ERK (B, C); PKA (E, F); PKC (H, I); or Akt (K, L) in OVX or male rats, respectively. \* $p < 0.01$  compared to sham. # $p < 0.01$  compared to OVX.
